# Supplementary material for: Structural and electronic modulation of conductive MOFs for efficient oxygen evolution reaction electrocatalysis
Source: Royal Society of Chemistry journal article supplement (doi:10.1039/d1ta01970h), 2021-01-01
Supplement: d1ta01970h1.pdf [file d1ta01970h1.pdf]

## Electronic Supplementary Information

# Structural and Electronic Modulation of Conductive MOFs for Efficient Oxygen Evolution Reaction Electrocatalysis

Jiawen Li, Peng Liu, Jianxin Mao, Jianyue Yan, and Wenbo Song\*

*College of Chemistry, Jilin University, Changchun 130012, P.R. China.*

*\*E-mail: wbsong@jlu.edu.cn*

## Contents:

|                                                          |    |
|----------------------------------------------------------|----|
| 1. Experimental Section .....                            | 2  |
| 2. PXRD Patterns .....                                   | 3  |
| 3. SEM and TEM Images .....                              | 4  |
| 4. XPS Spectra .....                                     | 6  |
| 5. Linear Sweep Voltammetry .....                        | 8  |
| 6. ECSA Measurements .....                               | 9  |
| 7. Stability Test .....                                  | 10 |
| 8. Comparison with Commercial Catalyst .....             | 12 |
| 9. Theoretical Calculation Model .....                   | 13 |
| 10. Comparison Table .....                               | 14 |
| 11. Equivalent Circuit Parameters for EIS Analysis ..... | 15 |

## 1. Experimental Section

**TOF calculation:** The TOF values were estimated based on our previous report, resulting in the following formula:<sup>123</sup>

$$\text{TOF} = \frac{\text{number of total oxygen turnovers / cm}^2}{\text{number of active sites / cm}^2}$$

The number of total oxygen turnovers was calculated from the current density by the following equation:

$$\text{Number of } O_2 = \left( J \frac{\text{mA}}{\text{cm}^2} \right) \left( \frac{1 \text{ C s}^{-1}}{1000 \text{ mA}} \right) \left( \frac{1 \text{ mol e}^-}{96485.3 \text{ C}} \right) \left( \frac{1 \text{ mol } O_2}{4 \text{ mol e}^-} \right) \left( \frac{6.022 * 10^{23} \text{ } O_2 \text{ molecules}}{1 \text{ mol } O_2} \right) = 1.56 * 10^{15} \frac{O_2/s}{\text{cm}^2} \text{ per } \frac{\text{mA}}{\text{cm}^2}$$

The number of active sites was regarded as the number of surface sites (Ni-O<sub>4</sub> and Fe-O<sub>4</sub> are regarded as active sites), and calculated by the following formula:

$$\text{Nuber of active sites} = \left( \frac{\text{number of metal sites / unit cell}}{\text{Volume / unit cell}} \right)^{\frac{2}{3}}$$

Finally, the plot of current density can be converted into a TOF plot according to the following formula:

$$\text{TOF} = \frac{\left( 1.56 * 10^{15} \frac{O_2}{\text{s cm}^2} \text{ per } \frac{\text{mA}}{\text{cm}^2} \right) * |J|}{\text{Number of active sites} * A_{\text{ECSA}}}$$

The  $A_{\text{ECSA}}$  is the electrochemical active surface area, which can be calculated from the following formula, where specific capacitance is  $C_{\text{dl}}$ , and  $40 \mu\text{F cm}^{-2}$  is a constant to convert capacitance to  $A_{\text{ECSA}}$ :

$$A_{\text{ECSA}} = \frac{\text{specific capacitance}}{40 \mu\text{F cm}^{-2} \text{ per cm}_{\text{ECSA}}^2}$$

**D-band center Analysis:** The d-band center ( $\varepsilon_d$ ) was calculated according to following equation:<sup>4</sup>

$$\varepsilon_d = \frac{\int_{-\infty}^0 N(\varepsilon) \varepsilon d\varepsilon}{\int_{-\infty}^0 N(\varepsilon) d\varepsilon}$$

Where  $N(\varepsilon)$  is the d-band DOS,  $\varepsilon$  is the energy.

## 2. PXRD Patterns

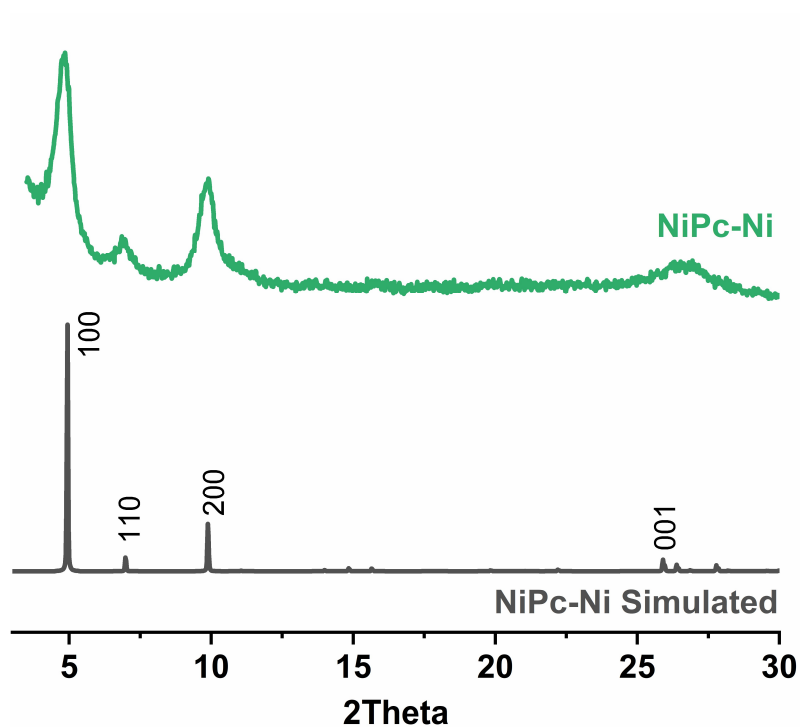

**Figure S1.** Experimental (green) and simulated (grey) PXRD pattern of NiPc-Ni MOF.

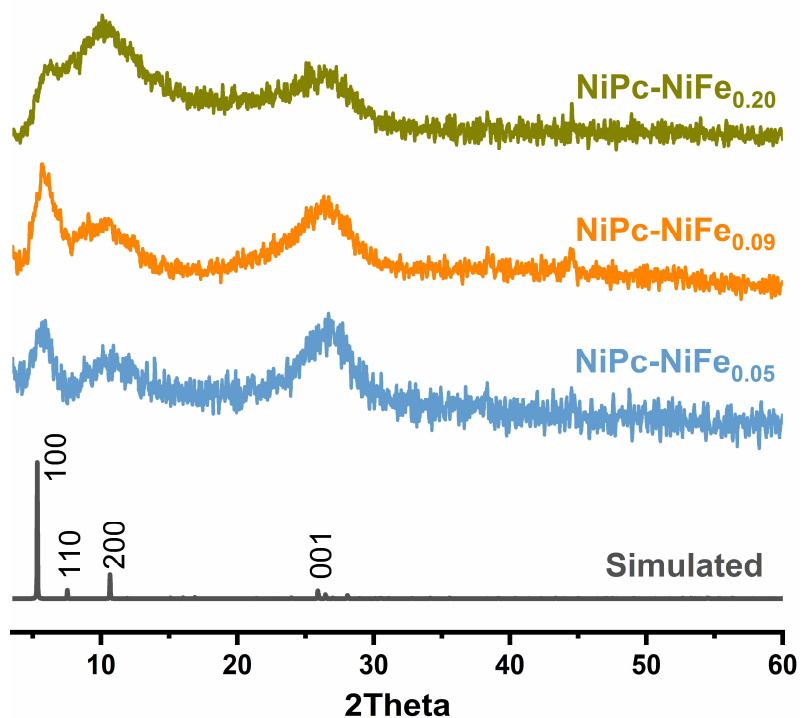

**Figure S2.** Experimental PXRD patterns of NiPc-NiFe<sub>0.05</sub>, NiPc-NiFe<sub>0.09</sub>, NiPc-NiFe<sub>0.20</sub>, and simulated pattern of NiPc-NiFe<sub>0.50</sub>.

### 3. SEM and TEM Images

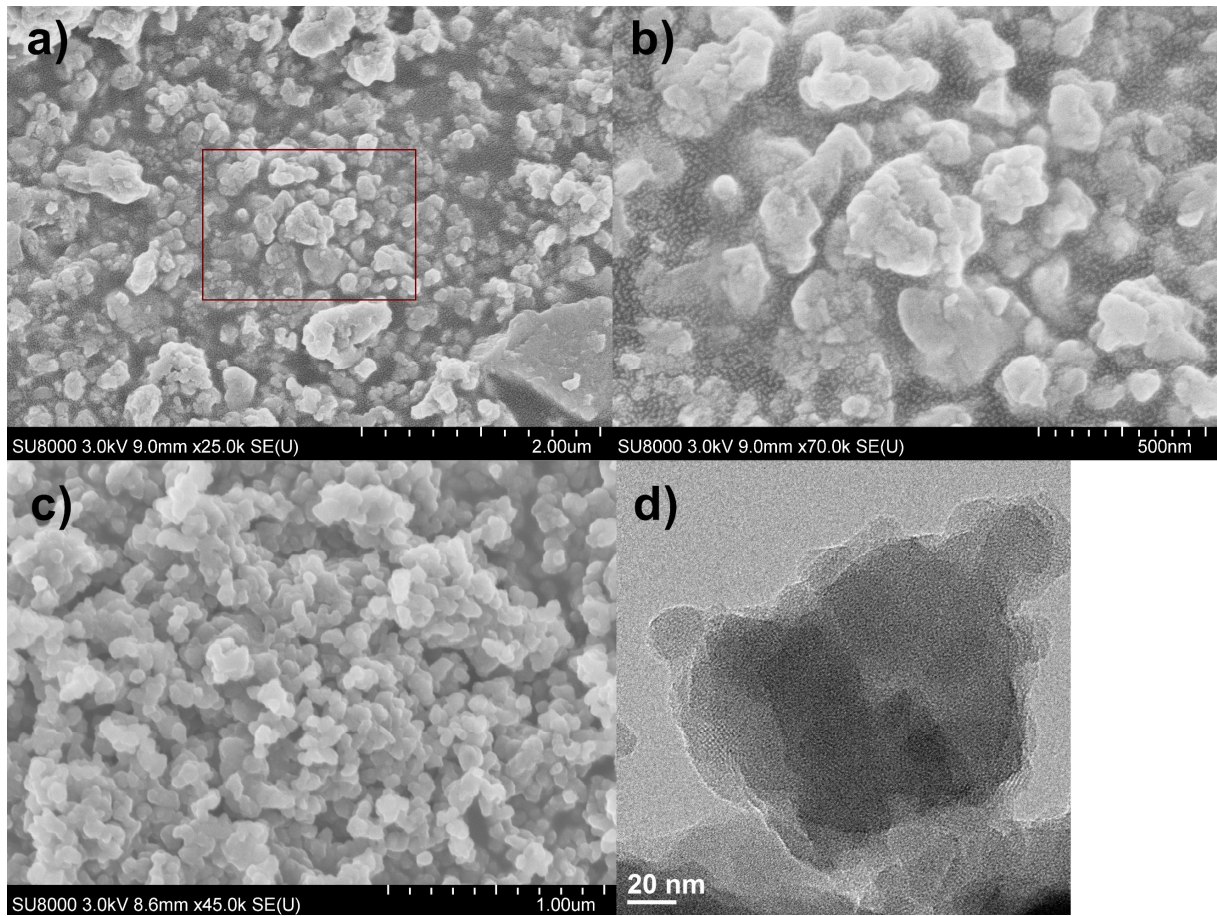

**Figure S3.** SEM images (a, b) of NiPc-Fe, SEM (c) and TEM (d) image of NiPc-Ni.



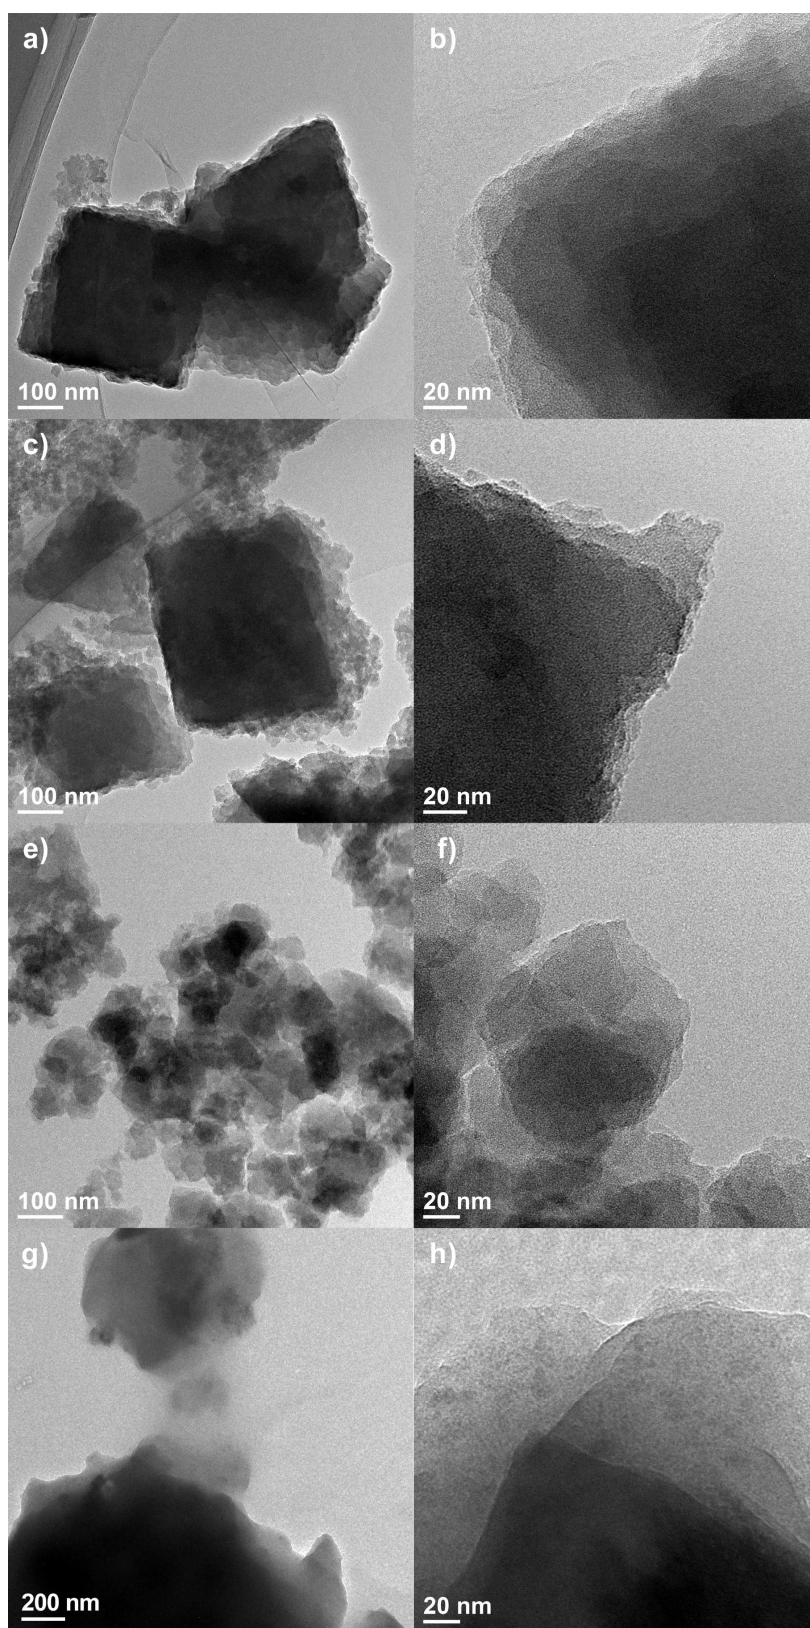

**Figure S4.** TEM images of NiPc-NiFe<sub>0.05</sub> (a, b), NiPc-NiFe<sub>0.09</sub> (c, d), NiPc-NiFe<sub>0.20</sub> (e, f), NiPc-Fe (g, h).

## 4. XPS Spectra

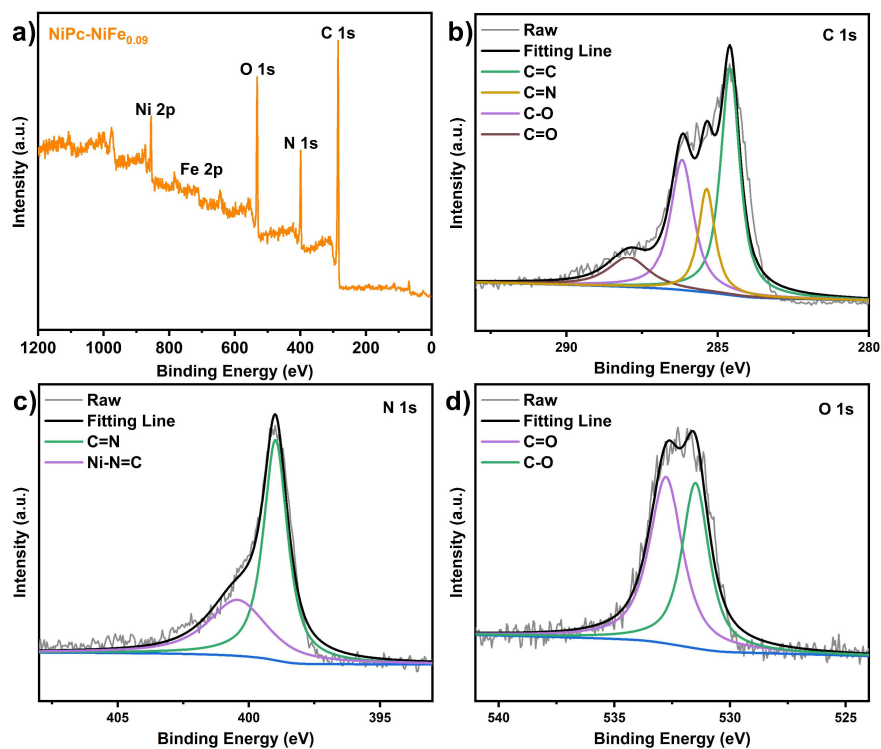

**Figure S5.** XPS spectra of NiPc-NiFe<sub>0.09</sub>: a) survey, b) C 1s, c) N 1s, d) O 1s. There is an integral ratio of 55:45 for C=O : C-O.

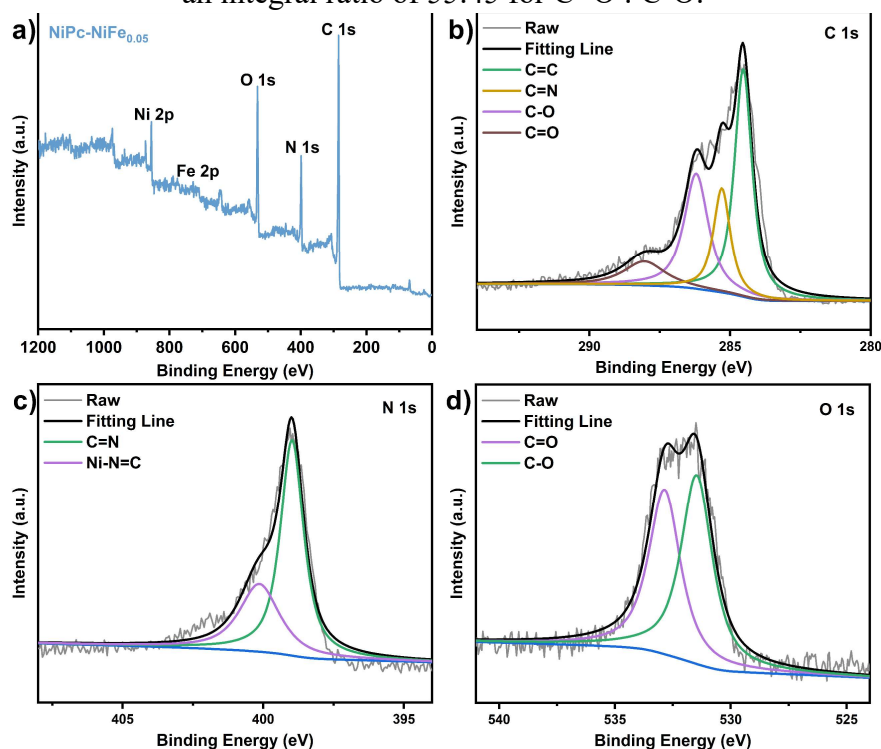

**Figure S6.** XPS spectra of NiPc-NiFe<sub>0.05</sub>: a) survey, b) C 1s, c) N 1s, d) O 1s. There is an integral ratio of 47:53 for C=O : C-O.

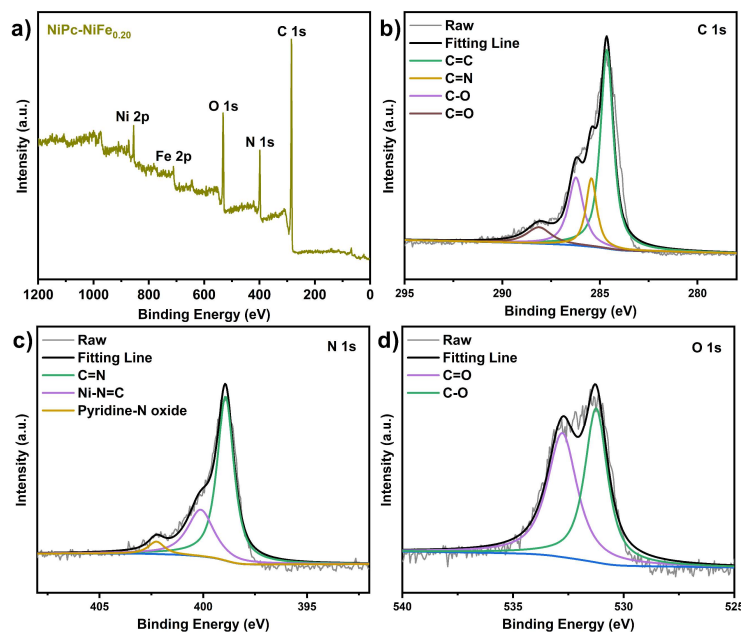

**Figure S7.** XPS spectra of NiPc-NiFe<sub>0.20</sub>: a) survey, b) C 1s, c) N 1s, d) O 1s. There is an integral ratio of 51:49 for C=O : C-O.

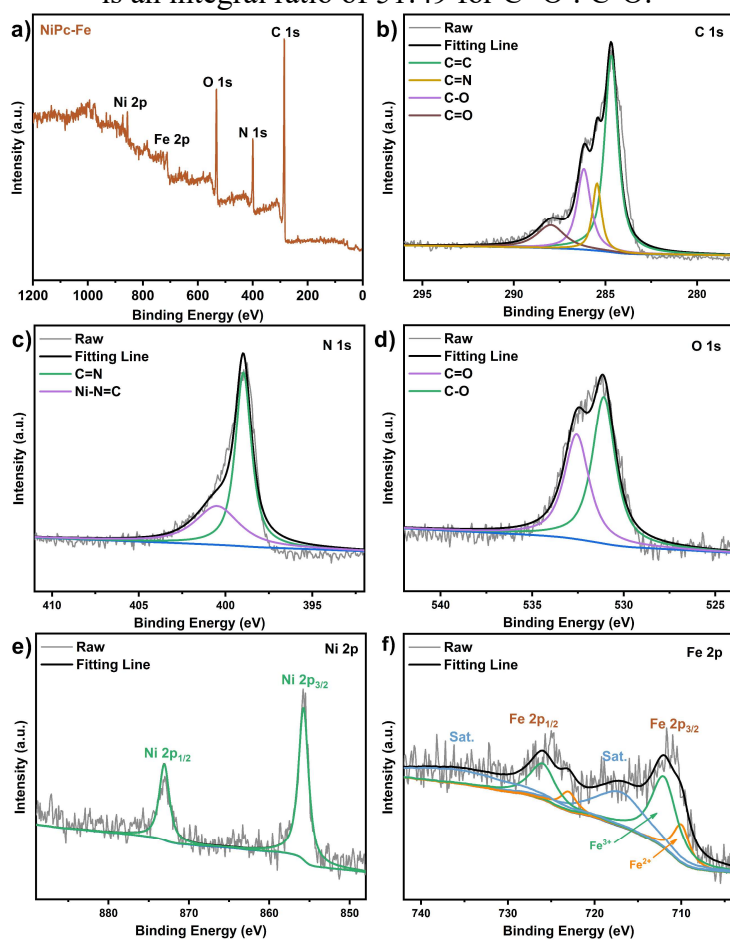

**Figure S8.** XPS spectra of NiPc-Fe: a) survey, b) C 1s, c) N 1s, d) O 1s, e) Ni 2p, f) Fe 2p. There is an integral ratio of 56:44 for C=O : C-O.

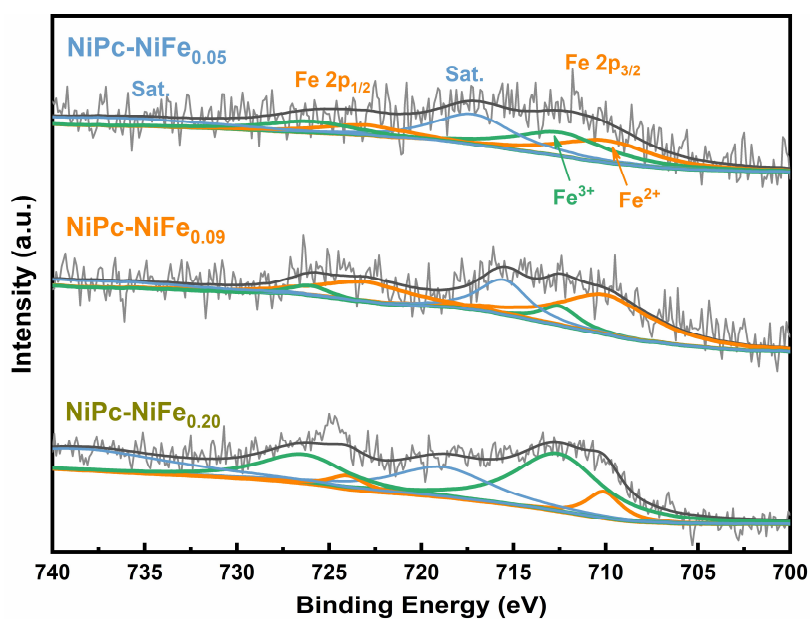

Figure S9. High-resolution Fe 2p XPS spectra of NiPc-NiFe<sub>0.05</sub>, NiPc-NiFe<sub>0.09</sub>, and NiPc-NiFe<sub>0.20</sub>.

## 5. Linear Sweep Voltammetry

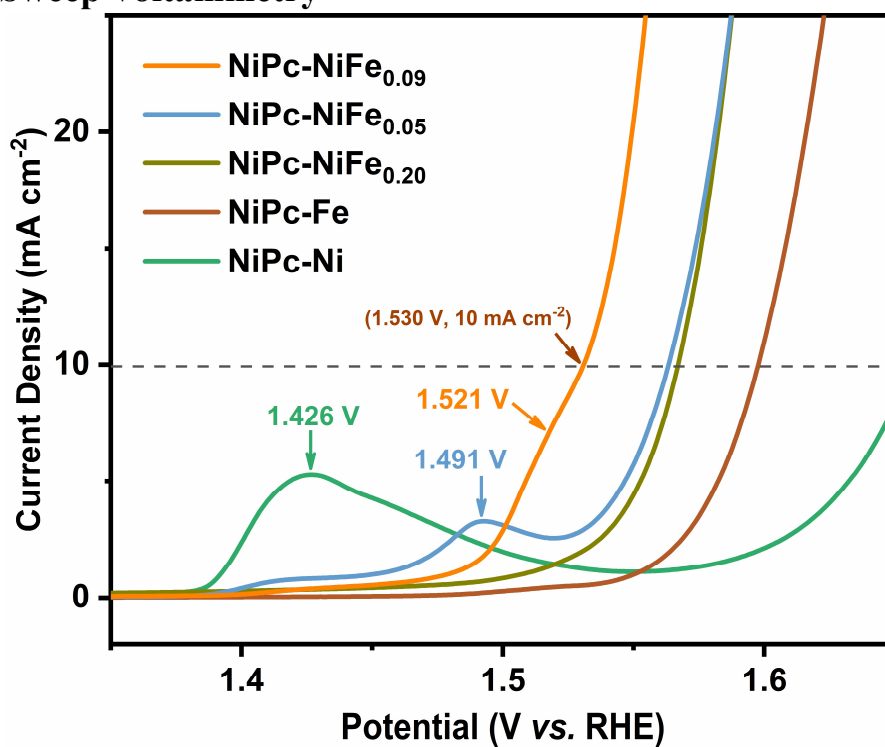

Figure S10. Enlarged LSV plots for OER.

## 6. ECSA Measurements

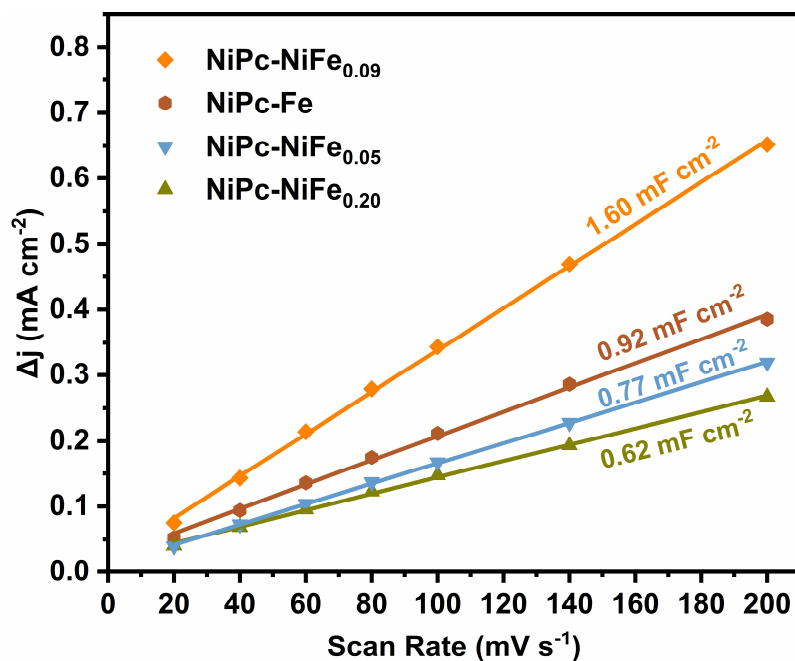

Figure S11. Scan rate dependent-current densities at 0.92 V vs. RHE

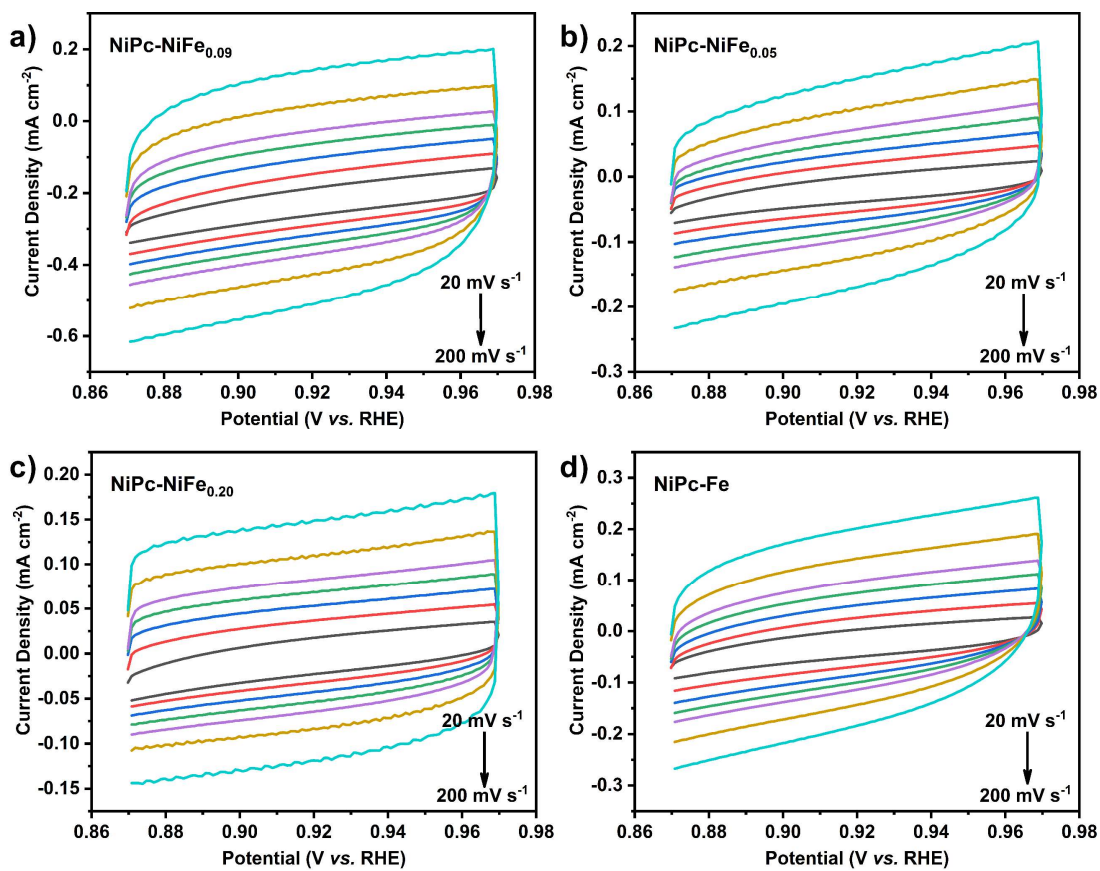

Figure S12. CVs in non-faradaic region of four MOFs.

## 7. Stability Test

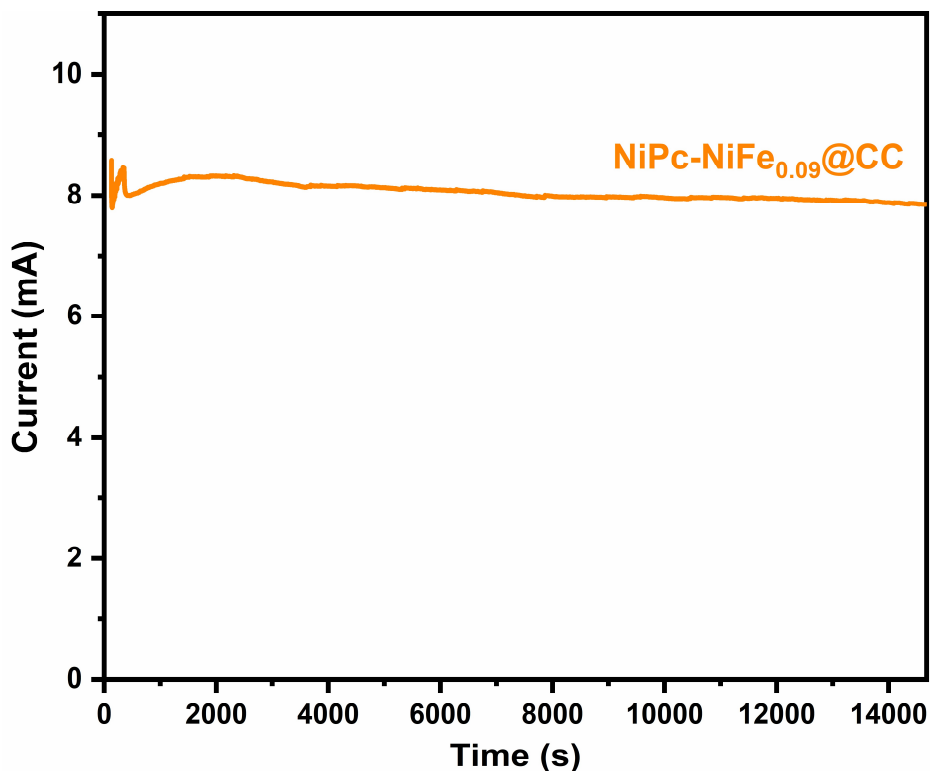

Figure S13. Chronopotentiometry test of NiPc-NiFe<sub>0.09</sub>@CC (Carbon Cloth).

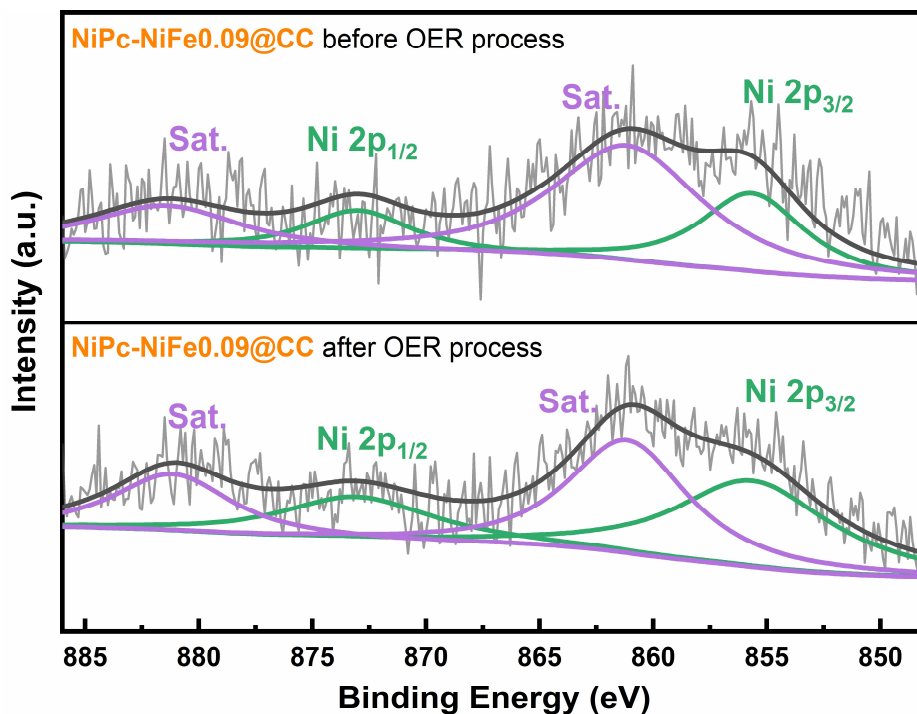

Figure S14. High-resolution Ni 2p XPS spectra before and after Chronopotentiometry test of NiPc-NiFe<sub>0.09</sub>@CC.



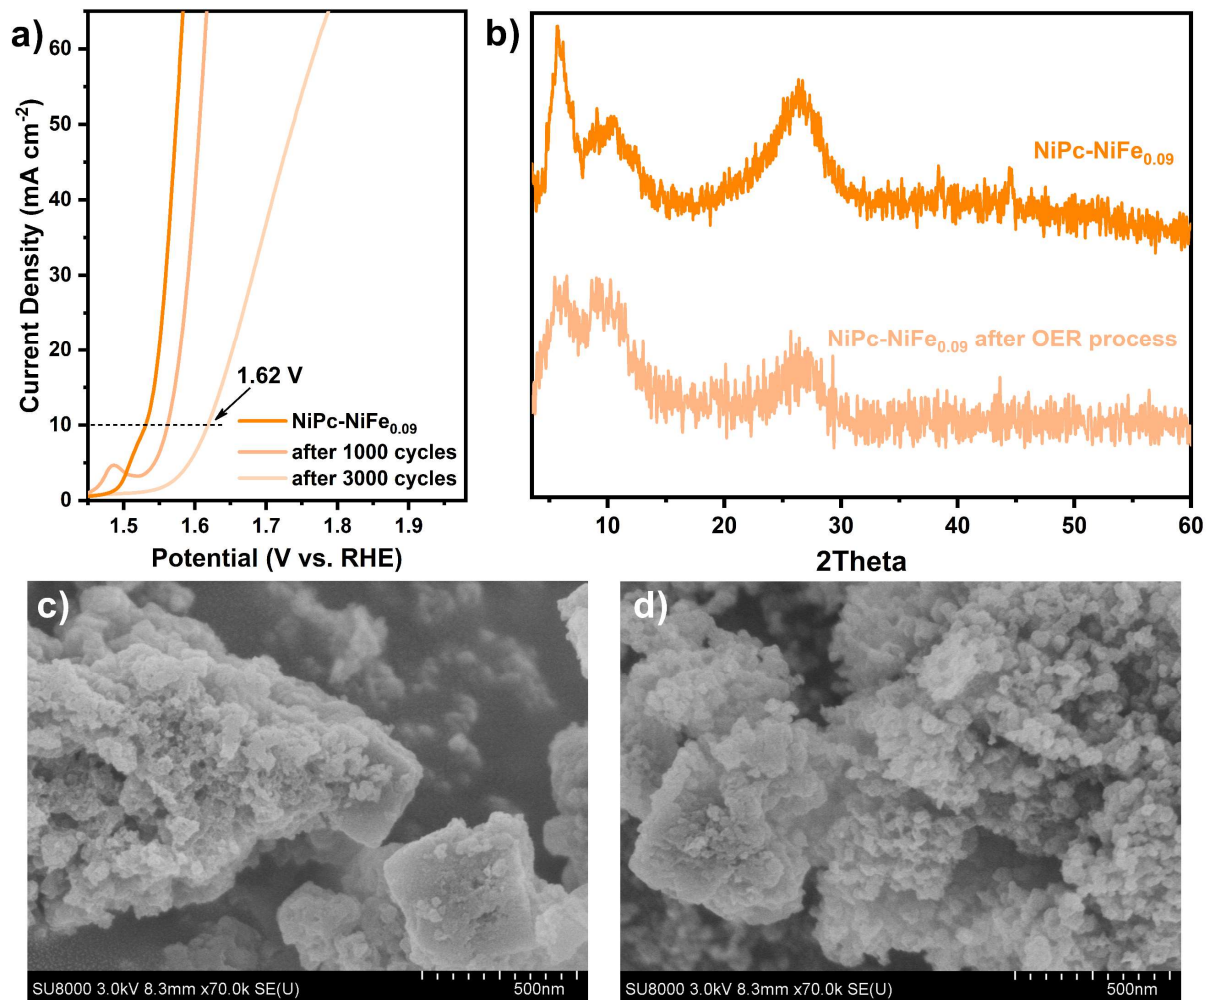

**Figure S15.** (a) LSV curves of NiPc-NiFe<sub>0.09</sub> after 3000 CV cycles, (b) PXRD patterns of NiPc-NiFe<sub>0.09</sub> before and after OER process, (c, d) SEM images of NiPc-NiFe<sub>0.09</sub> after OER process (3000 CV cycles).

## 8. Comparison with Commercial Catalyst

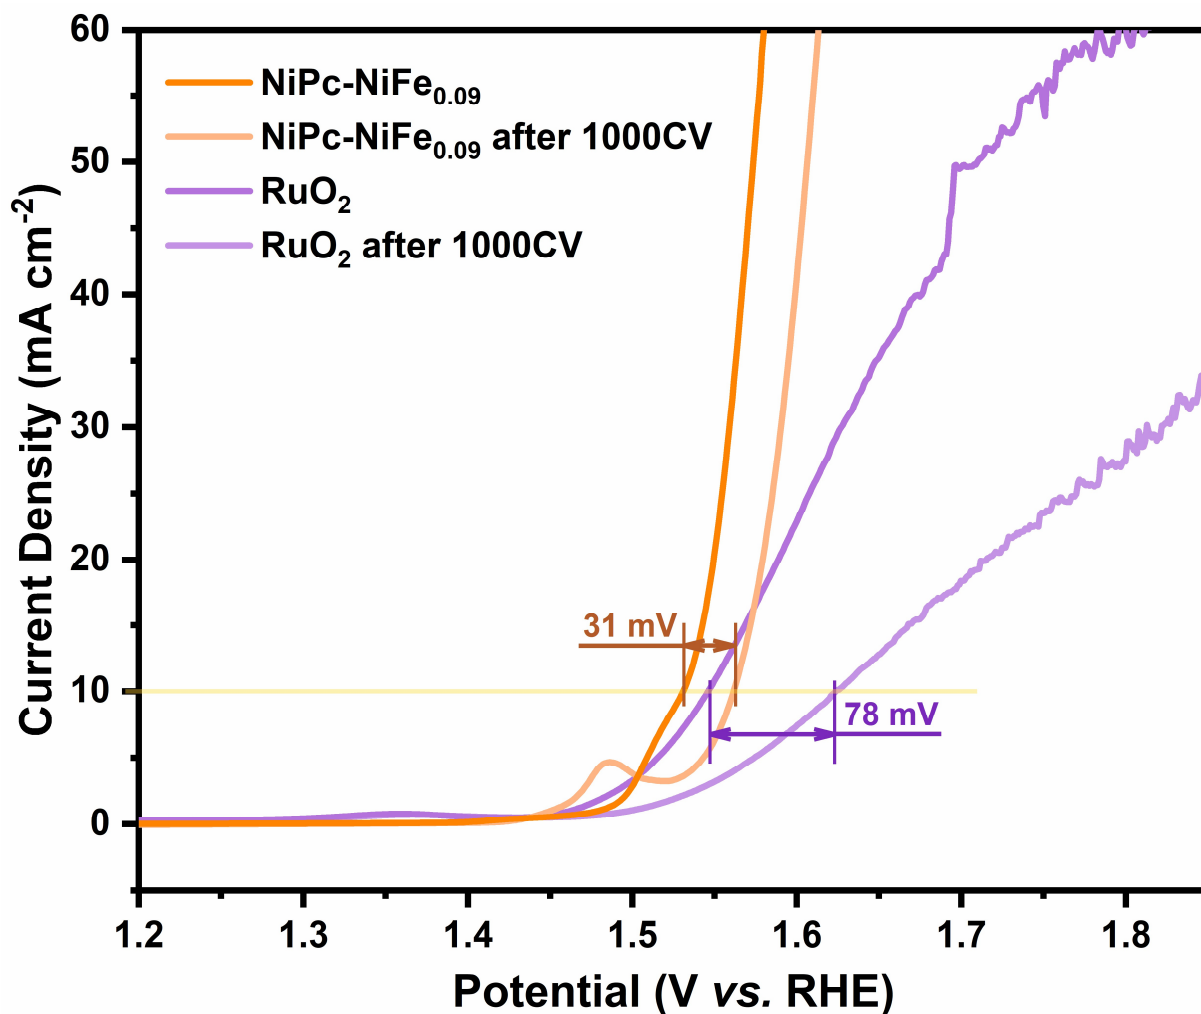

**Figure S16.** LSV curves of NiPc-NiFe<sub>0.09</sub> and commercial RuO<sub>2</sub> catalyst before and after 1000 CV cycles, the values in the figure are the shift of  $\eta$  @10 mA cm<sup>-2</sup> after 1000 CV cycles. Besides, the  $\eta$  of RuO<sub>2</sub> is 317 mV @10 mA cm<sup>-2</sup>, which is larger than that of NiPc-NiFe<sub>0.09</sub>, indicating the superior OER electrocatalytic performance of NiPc-NiFe<sub>0.09</sub>.



## 9. Theoretical Calculation Model

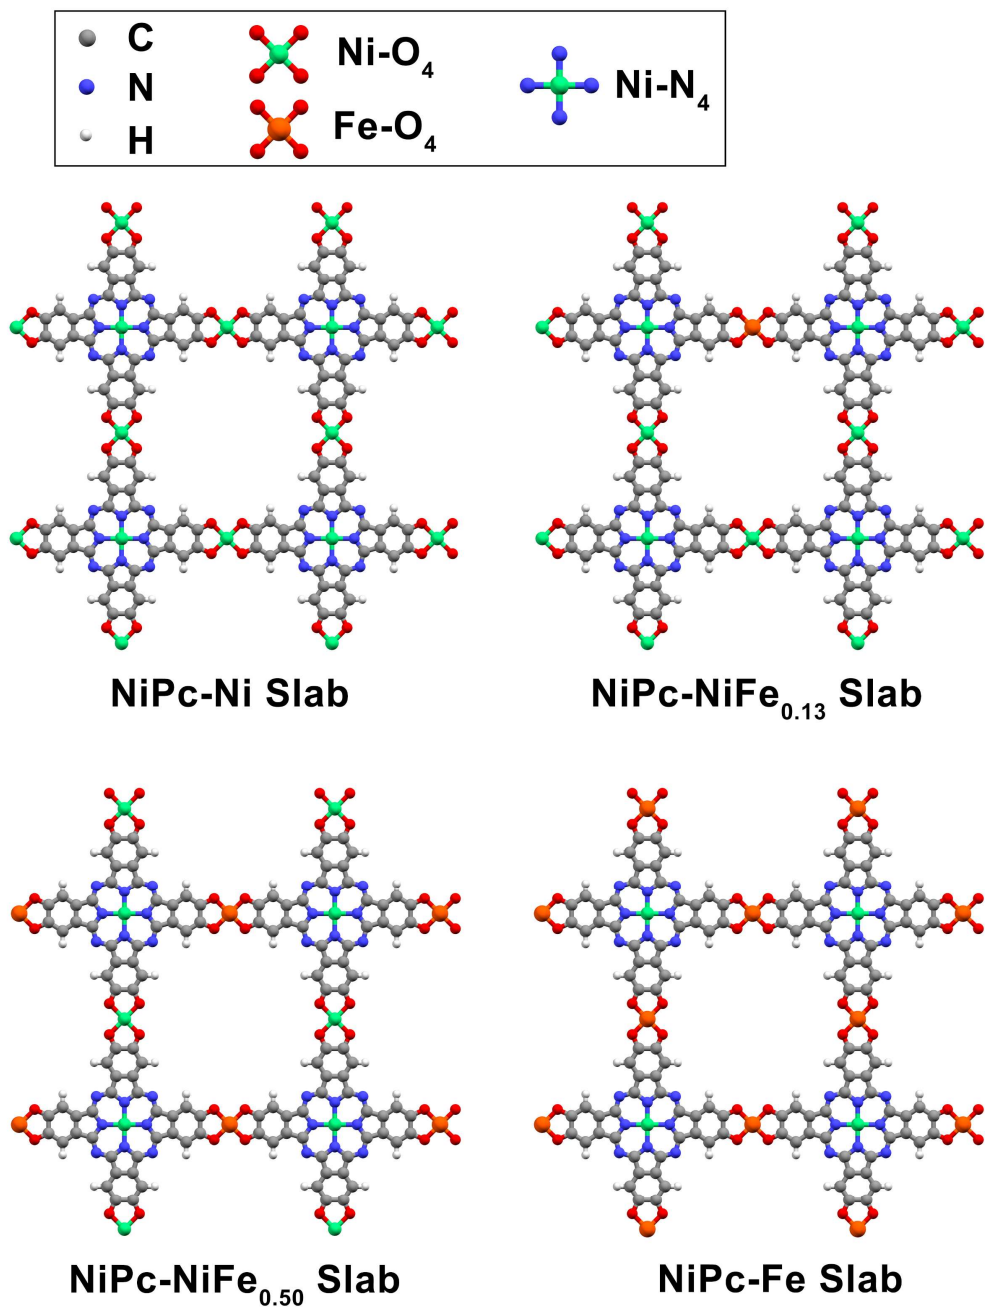

Figure S17. Constructed MOF Slabs for calculation.

## 10. Comparison Table

**Table S1.** Comparisons of the OER activity of MOF-based catalysts.

| Catalyst                                                | Electrolyte      | $\eta @$<br>$j=10 \text{ mA cm}^{-2}$<br>(mV) | $\eta @$<br>$j=100 \text{ mA cm}^{-2}$<br>(mV) | Tafel slope<br>(mV dec <sup>-1</sup> ) | TOF<br>(s <sup>-1</sup> )                                                   | Substrate | Ref.                                                             |
|---------------------------------------------------------|------------------|-----------------------------------------------|------------------------------------------------|----------------------------------------|-----------------------------------------------------------------------------|-----------|------------------------------------------------------------------|
| <b>NiPc-NiFe<sub>0.09</sub></b>                         | <b>1.0 M KOH</b> | <b>300</b>                                    | <b>384</b>                                     | <b>55</b>                              | <b>1.943 @<math>\eta=300</math> mV<br/>11.943 @<math>\eta=350</math> mV</b> | <b>GC</b> | <b>This work</b>                                                 |
| MAF-X27-OH                                              | 1.0 M KOH        | 387                                           | -                                              | 66                                     | 0.0014 @ $\eta=300$ mV<br>0.038 @ $\eta=400$ mV                             | GC        | <i>J. Am. Chem. Soc.</i> , 2016, <b>138</b> , 8336.              |
| Ni-HAB                                                  | 1.0 M KOH        | 320                                           | -                                              | 51                                     | 0.016 @ $\eta=300$ mV                                                       | CFP       | <i>Small</i> , 2020, <b>16</b> , 1907043.                        |
| NiCo-UMOFNs                                             | 1.0 M KOH        | 250                                           | -                                              | 42                                     | 0.86 @ $\eta=300$ mV                                                        | GC        | <i>Nat. Energy</i> , 2016, <b>1</b> , 16184.                     |
| Pb-TCPP                                                 | 1.0 M KOH        | 470                                           | -                                              | 106.2                                  | 0.00051 @ $\eta=1.2$ V                                                      | GC        | <i>Dalton Trans.</i> , 2016, <b>45</b> , 61-65.                  |
| CUMSs-ZIF-67                                            | 1.0 M KOH        | 410                                           | -                                              | 185.1                                  | 0.462 @ $\eta=300$ mV                                                       | GC        | <i>Nano Energy</i> , 2017, <b>41</b> , 417-425.                  |
| UTSA-16                                                 | 1.0 M KOH        | 408                                           | 710*                                           | 77                                     | -                                                                           | GC        | <i>ACS Appl. Mater. Interfaces</i> , 2017, <b>9</b> , 7193-7201. |
| CoNi-Cu(BDC)                                            | 1.0 M KOH        | 327                                           | 420*                                           | 75.7                                   | -                                                                           | GC        | <i>New J. Chem.</i> , 2020, <b>44</b> , 2459-2464.               |
| Ni <sub>5.7</sub> Ru <sub>0.3</sub> (HHTP) <sub>3</sub> | 0.1 M KOH        | 390                                           | -                                              | 61                                     | -                                                                           | GC        | <i>Chem. Commun.</i> , 2020, <b>56</b> , 13615-13618.            |
| [Co <sub>3</sub> (HHTP) <sub>2</sub> ] <sub>n</sub>     | 0.1 M KOH        | 490                                           | -                                              | 83                                     | -                                                                           | FTO       | <i>Chem. Commun.</i> , 2018, <b>54</b> , 13579-13582             |
| NNU-23                                                  | 0.1 M KOH        | 365                                           | -                                              | 81.8                                   | 0.03 @ $\eta=400$ mV                                                        | CC        | <i>Angew. Chem. Int. Ed.</i> , 2018, <b>57</b> , 9660-9664.      |

\*These values are estimated by LSV plots in the literatures.

## 11. Equivalent Circuit Parameters for EIS Analysis

**Table S2.** Fitting Results of these conductive MOFs.

|                           | $R_s$ ( $\Omega$ cm <sup>2</sup> ) | $CPE$ (mF cm <sup>-2</sup> ) | $R_p$ ( $\Omega$ cm <sup>2</sup> ) | $C_{dl}$ (mF cm <sup>-2</sup> ) | $R_{ct}$ ( $\Omega$ cm <sup>2</sup> ) | $Z_o$ (S s <sup>0.5</sup> cm <sup>-2</sup> ) |
|---------------------------|------------------------------------|------------------------------|------------------------------------|---------------------------------|---------------------------------------|----------------------------------------------|
| NiPc-NiFe <sub>0.09</sub> | 0.8756                             | 0.3521                       | 0.05715                            | 86.92                           | 0.3315                                | 0.1189                                       |
| NiPc-NiFe <sub>0.05</sub> | 0.7179                             | 1.726                        | 0.139                              | 26.62                           | 1.557                                 | 0.1055                                       |
| NiPc-NiFe <sub>0.20</sub> | 0.949                              | 0.1827                       | 0.1603                             | 1.594                           | 2.319                                 | 0.02773                                      |
| NiPc-Fe                   | 0.7634                             | 1.225                        | 3.953                              | 1.078                           | 12.26                                 | 0.1232                                       |
| NiPc-Ni                   | 0.7638                             | 427.2                        | 0.3281                             | 40.17                           | 19.25                                 | 0.3553                                       |

In the applied module,  $R_s$  represents solution resistance, which a combination of contact resistance in the overall circuit and electrolyte.  $CPE$  represents the constant phase elements.  $R_p$  and  $R_{ct}$  are on behalf of the resistance of surface porosity and charge-transfer resistance, respectively.  $C_{dl}$  represents the double-layer capacitance, which is formed by the adsorption of ions in the solution onto the surface of the electrode.  $Z_o$  is limited Warburg impedance, which is originated from finite diffusion layer (such as a thin cell or a coated sample).

The similar value of  $R_s$  indicates the conditions of our electrochemical tests are constant. The small value of  $R_p$  of NiPc-NiFe<sub>0.09</sub> demonstrates that this catalyst is highly porous.<sup>5</sup> The value of  $C_{dl}$  of NiPc-NiFe<sub>0.09</sub> is significantly larger than other MOFs, in accordance with its highest electrocatalytic performance.  $R_{ct}$  value reflects the ability of charge transfer between electrolyte and electrode. The smallest value of 0.3315  $\Omega$  cm<sup>2</sup> of NiPc-NiFe<sub>0.09</sub> proves the highest electron transport efficiency.

### References:

- <sup>1</sup> J. Kibsgaard and T. F. Jaramillo, *Angew. Chem. Int. Ed.*, 2014, **53**, 14433-14437.
- <sup>2</sup> Z. Liu, Z. Zhao, Y. Wang, S. Dou, D. Yan, D. Liu, Z. Xia and S. Wang, *Adv. Mater.*, 2017, **29**, 1606207.
- <sup>3</sup> Z. Chen, Y. Song, J. Cai, X. Zheng, D. Han, Y. Wu, Y. Zang, S. Niu, Y. Liu, J. Zhu, X. Liu, and G. Wang, *Angew. Chem. Int. Ed.*, 2018, **57**, 5076.
- <sup>4</sup> H. Wang, J. Wang, Y. Pi, Q. Shao, Y. Tan, and X. Huang, *Angew. Chem. Int. Ed.*, 2019, **58**, 2316.
- <sup>5</sup> Y. Huang, J. Ge, J. Hu, J. Zhang, J. Hao, and Y. Wei, *Adv. Energy Mater.*, 2018, **8**, 1701601.
